# Supplementary material for: Anti-neuroinflammatory effects of GPR55 antagonists in LPS-activated primary microglial cells
Source: PubMed Central journal article supplement (PMC6240959; doi:10.1186/s12974-018-1362-7), 2018-11-19

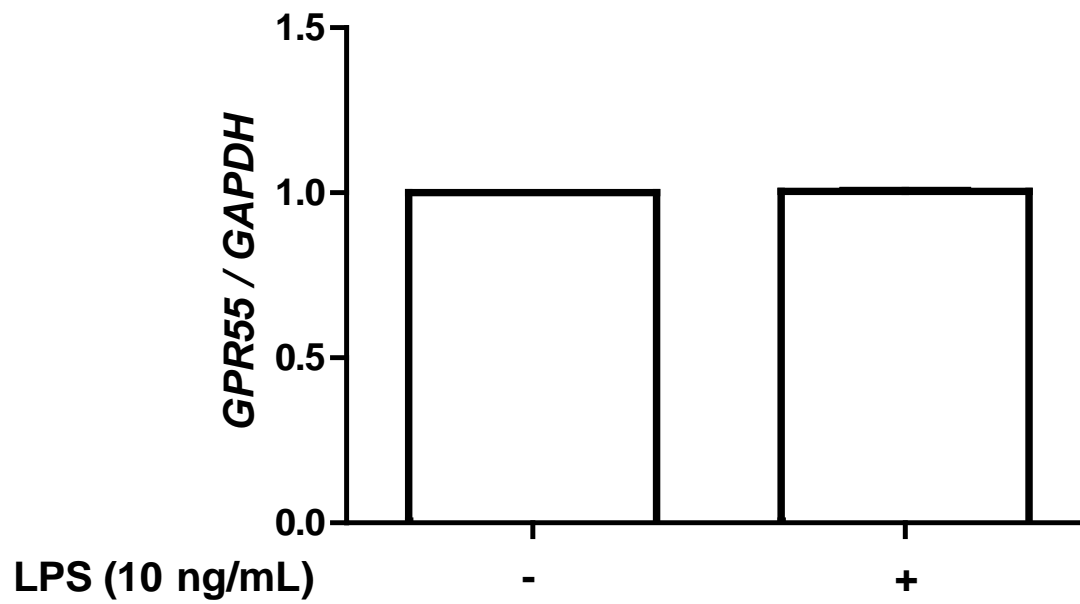

Supplement: 12974_2018_1362_MOESM1_ESM.pdf [file 12974_2018_1362_MOESM1_ESM.pdf]
