# Supplementary material for: Anti-neuroinflammatory effects of GPR55 antagonists in LPS-activated primary microglial cells
Source: PubMed Central journal article supplement (PMC6240959; doi:10.1186/s12974-018-1362-7), 2018-11-19
Supplement: 12974_2018_1362_MOESM2_ESM.pdf [file 12974_2018_1362_MOESM2_ESM.pdf]

**Additional file 2:** Screening of 21 chemical related GPR55 receptor antagonists (KIT 1 - KIT 21) on LPS-induced PGE<sub>2</sub> synthesis in microglial cells.

| Compound | Corresponding number according Rempel et al., 2013 | Prostaglandin E <sub>2</sub> Release Inhibition 100 μM |                        |
|----------|----------------------------------------------------|--------------------------------------------------------|------------------------|
| KIT 1    | 35                                                 | **                                                     |                        |
| KIT 2    | 13                                                 | *                                                      |                        |
| KIT 3    | 14                                                 | ***                                                    |                        |
| KIT 4    | Unpublished                                        | *                                                      |                        |
| KIT 5    | 29                                                 | ***                                                    |                        |
| KIT 6    | Unpublished                                        | *                                                      |                        |
| KIT 7    | Unpublished                                        | **                                                     | * 10-50% inhibition    |
| KIT 8    | Unpublished                                        | *                                                      | ** 50-90% inhibition   |
| KIT 9    | Unpublished                                        | *                                                      | *** 90-100% inhibition |
| KIT 10   | Unpublished                                        | ***                                                    |                        |
| KIT 11   | 38                                                 | *                                                      |                        |
| KIT 12   | 39                                                 | ***                                                    |                        |
| KIT 13   | Unpublished                                        | *                                                      |                        |
| KIT 14   | Unpublished                                        | ***                                                    |                        |
| KIT 15   | Unpublished                                        | *                                                      |                        |
| KIT 16   | Unpublished                                        | **                                                     |                        |
| KIT 17   | 37                                                 | ***                                                    |                        |
| KIT 18   | 27                                                 | ***                                                    |                        |
| KIT 19   | Unpublished                                        | **                                                     |                        |
| KIT 20   | Unpublished                                        | **                                                     |                        |
| KIT 21   | 41                                                 | ***                                                    |                        |
